# Supplementary material for: Environmental Complexity: Additional Human Visual Contact Reduced Meat Chickens’ Fear of Humans and Physical Items Altered Pecking Behavior
Source: MDPI journal article supplement (doi:10.3390/ani12030310), 2022-01-27
Supplement: s1 [file s1]

**Table S1.** Estimated marginal means of the proportion of time spent drinking, standing, walking and performing comfort or other behaviors for birds that were raised under standard conditions (C); with physical items (P); or with additional human contact (HC). Differing superscript indicates a significant difference at  $p < 0.05$  between treatment groups. Bold font indicates significant  $p$ -values at  $p < 0.05$ .

|          | C                 | P                 | HC                | SEM  | <i>p</i> -Value |                  |                 |
|----------|-------------------|-------------------|-------------------|------|-----------------|------------------|-----------------|
|          |                   |                   |                   |      | Treatment       | Age              | Treatment × Age |
| Drinking | 0.27              | 0.29              | 0.29              | 0.02 | 0.728           | 0.670            | 0.722           |
| Standing | 0.73              | 0.72              | 0.85              | 0.04 | 0.124           | <b>&lt;0.001</b> | 0.066           |
| Walking  | 0.58              | 0.57              | 0.64              | 0.03 | 0.462           | <b>&lt;0.001</b> | 0.104           |
| Comfort  | 0.72 <sup>a</sup> | 0.54 <sup>b</sup> | 0.72 <sup>a</sup> | 0.03 | <b>0.005</b>    | <b>&lt;0.001</b> | 0.163           |
| Other    | 0.00              | 0.00              | 0.00              | 0.01 | 0.376           | <b>0.001</b>     | 0.384           |

**Table S2.** Indicators of fearfulness (estimated marginal means and SEM) during the open field test for chickens that were raised under standard conditions (Control; C), with additional physical items (P) or with additional human contact (HC) and model SEM are reported for birds tested at 21 and 35 days of age. Bold font indicates significant  $p$ -values at  $p < 0.05$ .

| Age     | Variable                | C     | P     | HC    | SEM  | <i>p</i> -Value |              |           |
|---------|-------------------------|-------|-------|-------|------|-----------------|--------------|-----------|
|         |                         |       |       |       |      | Treatment       | Sex          | Trt × Sex |
| 21 days | Vocalizations           | 205.7 | 242.8 | 240.0 | 10.7 | 0.389           | <b>0.005</b> | 0.138     |
|         | Latency to vocalize (s) | 13.1  | 6.5   | 6.7   | 1.42 | 0.174           | 0.331        | 0.769     |
|         | Time spent immobile (s) | 5.7   | 6.2   | 4.5   | 1.94 | 0.949           | 0.704        | 0.903     |
|         | Attempted to escape (%) | 0.8   | 0.8   | 0.6   | 0.07 | 0.233           | 0.254        | 0.569     |
|         | Defecations             | 1.3   | 1.0   | 1.4   | 0.12 | 0.523           | 0.087        | 0.841     |
| 35 days | Vocalizations           | 76.1  | 46.6  | 41.6  | 8.70 | 0.710           | <b>0.043</b> | 0.995     |
|         | Latency to vocalize (s) | 10.4  | 13.5  | 13.5  | 1.90 | 0.589           | 0.064        | 0.562     |
|         | Time spent immobile (s) | 11.3  | 5.6   | 8.3   | 2.27 | 0.844           | 0.271        | 0.366     |
|         | Attempted to escape (%) | 0.8   | 1.0   | 0.8   | 0.05 | 0.411           | 0.297        | 0.174     |
|         | Defecations             | 1.02  | 1.34  | 1.07  | 0.13 | 0.414           | 0.604        | 0.643     |

**Table S3.** Estimated marginal means distance from stationary human (HAP) and the distance the chicken moved away from the approaching human (HAV) when chickens that were raised under standard conditions (Control); with additional physical items (P); or with additional human contact (HC). Differing superscript within a column indicates treatment differences at  $p < 0.05$ . Bold font indicates significant  $p$ -values at  $p < 0.05$ .

|          | C                       | P                       | HC                      | SEM | <i>p</i> -Value |
|----------|-------------------------|-------------------------|-------------------------|-----|-----------------|
| HAP (cm) | 65.5 ± 4.3 <sup>a</sup> | 67.6 ± 4.3 <sup>a</sup> | 53.1 ± 4.1 <sup>b</sup> | 2.5 | <b>0.052</b>    |
| HAV (cm) | 38.0 ± 4.9 <sup>a</sup> | 29.5 ± 5.2 <sup>a</sup> | 18.9 ± 4.7 <sup>b</sup> | 3.1 | <b>0.019</b>    |
